# Supplementary material for: Dynamic SARS-CoV-2 surveillance model combining seroprevalence and wastewater concentrations for post-vaccine disease burden estimates
Source: PubMed Central journal article supplement (PMC11004132; doi:10.1038/s43856-024-00494-y), 2024-04-09
Supplement: 43856_2024_494_MOESM1_ESM.pdf [file 43856_2024_494_MOESM1_ESM.pdf]

## Supplementary Information

### **Dynamic SARS-CoV-2 surveillance model combining seroprevalence and wastewater concentrations for post-vaccine disease burden estimates**

Rochelle H. Holm<sup>1,10</sup>, Grzegorz A. Rempala<sup>2,10</sup>, Boseung Choi<sup>2,3,4,10</sup>, J. Michael Brick<sup>5</sup>, Alok R. Amraotkar<sup>1</sup>, Rachel J. Keith<sup>1</sup>, Eric C. Rouchka<sup>6,7</sup>, Julia H. Chariker<sup>6,7</sup>, Kenneth E. Palmer<sup>8,9</sup>, Ted Smith<sup>1,11</sup> & Aruni Bhatnagar<sup>1,11\*</sup>

<sup>1</sup>Christina Lee Brown Envirome Institute, School of Medicine, University of Louisville, Louisville, KY 40202, USA

<sup>2</sup>Division of Biostatistics, College of Public Health, The Ohio State University, Columbus, OH 43210, USA

<sup>3</sup>Division of Big Data Science, Korea University, Sejong, South Korea

<sup>4</sup>Biomedical Mathematics Group, Institute for Basic Science, Daejeon, South Korea

<sup>5</sup>Westat, Inc., Rockville, MD 20850, USA

<sup>6</sup>Department of Biochemistry and Molecular Genetics, University of Louisville, Louisville, KY 40292, USA

<sup>7</sup>KY INBRE Bioinformatics Core, University of Louisville, Louisville, KY 40202, USA

<sup>8</sup>Center for Predictive Medicine for Biodefense and Emerging Infectious Diseases, University of Louisville, Louisville, KY 40202, USA

<sup>9</sup>Department of Pharmacology and Toxicology, School of Medicine, University of Louisville, Louisville, KY 40202, USA

<sup>10</sup>These authors contributed equally: Rochelle H. Holm, Grzegorz A. Rempala, Boseung Choi.

<sup>11</sup>These authors jointly supervised this work: Ted Smith, Aruni Bhatnagar.

\*Correspondence to: Prof Aruni Bhatnagar, Christina Lee Brown Envirome Institute, School of Medicine, University of Louisville, Louisville, KY 40202, USA; aruni.bhatnagar@louisville.edu; 1.502.852.5724

Keywords: seroprevalence; vaccination; wastewater

**Table of Contents**

|                                                                                                                |    |
|----------------------------------------------------------------------------------------------------------------|----|
| Supplementary Note 1. SARS-CoV-2 seroprevalence by wave and sewershed, Jefferson County, KY (USA).....         | 3  |
| Supplementary Note 2. Studied wastewater treatment plant zones (sewersheds), Jefferson County, KY (USA). ..... | 5  |
| Supplementary Note 3. Wastewater variant detection.....                                                        | 8  |
| Supplementary Note 4. Population vaccination model (SVI <sub>2</sub> RT). .....                                | 11 |
| Supplementary References.....                                                                                  | 33 |

**Supplementary Note 1. SARS-CoV-2 seroprevalence by wave and sewershed, Jefferson County, KY (USA).**

SARS-CoV-2 seroprevalence by wave and sewershed geographic zone as well as model estimates from this study for Jefferson County, KY (USA) are presented in Supplementary Table 1.

Supplementary Table 1. SARS-CoV-2 seroprevalence by wave and sewershed, Jefferson County, KY (USA).

|         | Number of unvaccinated participants | Number of vaccinated participants | Number of participants positive for SARS-CoV-2 nucleocapsid (N1) specific IgG antibodies <sup>a</sup> | Estimated posterior average percentage of seroprevalence (95% credible interval) | Estimated posterior average percentage of prevalence (95% credible interval) |
|---------|-------------------------------------|-----------------------------------|-------------------------------------------------------------------------------------------------------|----------------------------------------------------------------------------------|------------------------------------------------------------------------------|
| Overall |                                     |                                   |                                                                                                       |                                                                                  |                                                                              |
| MSD1    | 98                                  | 1464                              | 132                                                                                                   | 9.51 (3.78, 14.53)                                                               | 0.53 (0.04, 1.03)                                                            |
| MSD2    | 134                                 | 800                               | 81                                                                                                    | 5.43 (1.85, 9.01)                                                                | 0.34 (0.00, 0.67)                                                            |
| MSD3–5  | 86                                  | 721                               | 83                                                                                                    | 8.41 (2.64, 12.55)                                                               | 0.59 (0.00, 1.18)                                                            |
| Total   | 318                                 | 2985                              | 296                                                                                                   | 7.60 (2.64, 12.55)*                                                              | 0.47 (0.07, 0.92)*                                                           |
| Wave A  |                                     |                                   |                                                                                                       |                                                                                  |                                                                              |
| MSD1    | 27                                  | 372                               | 24                                                                                                    | 2.25 (1.69, 2.81)                                                                | 0.06 (0.01, 0.12)                                                            |
| MSD2    | 31                                  | 208                               | 25                                                                                                    | 2.28 (1.75, 2.80)                                                                | 0.05 (0.00, 0.10)                                                            |
| MSD3–5  | 13                                  | 113                               | 19                                                                                                    | 2.28 (1.68, 2.89)                                                                | 0.05 (0.01, 0.11)                                                            |
| Total   | 71                                  | 713                               | 68                                                                                                    | 2.27 (1.71, 2.82)*                                                               | 0.06 (0.00, 0.11)*                                                           |
| Wave B  |                                     |                                   |                                                                                                       |                                                                                  |                                                                              |
| MSD1    | 26                                  | 370                               | 17                                                                                                    | 2.93 (2.04, 3.81)                                                                | 0.20 (0.07, 0.39)                                                            |
| MSD2    | 40                                  | 192                               | 17                                                                                                    | 2.61 (1.83, 3.39)                                                                | 0.07 (0.00, 0.15)                                                            |
| MSD3–5  | 23                                  | 170                               | 8                                                                                                     | 2.95 (1.82, 4.09)                                                                | 0.27 (0.00, 0.54)                                                            |
| Total   | 89                                  | 733                               | 42                                                                                                    | 2.81 (1.92, 3.70)*                                                               | 0.16 (0.00, 0.33)*                                                           |
| Wave C  |                                     |                                   |                                                                                                       |                                                                                  |                                                                              |
| MSD1    | 16                                  | 309                               | 22                                                                                                    | 6.26 (2.54, 9.98)                                                                | 0.62 (0.04, 1.19)                                                            |
| MSD2    | 29                                  | 179                               | 11                                                                                                    | 3.70 (1.86, 5.53)                                                                | 0.20 (0.00, 0.39)                                                            |
| MSD3–5  | 15                                  | 171                               | 13                                                                                                    | 7.57 (2.05, 13.08)                                                               | 0.46 (0.00, 0.91)                                                            |
| Total   | 60                                  | 659                               | 46                                                                                                    | 5.47 (1.95, 8.99)*                                                               | 0.43 (0.00, 0.88)*                                                           |
| Wave D  |                                     |                                   |                                                                                                       |                                                                                  |                                                                              |
| MSD1    | 29                                  | 413                               | 69                                                                                                    | 19.57 (9.00, 30.15)                                                              | 0.81 (0.04, 1.62)                                                            |
| MSD2    | 34                                  | 220                               | 28                                                                                                    | 12.41 (1.87, 22.94)                                                              | 0.83 (0.00, 1.67)                                                            |
| MSD3–5  | 35                                  | 247                               | 43                                                                                                    | 14.75 (2.19, 27.30)                                                              | 1.44 (0.00, 2.88)                                                            |
| Total   | 98                                  | 880                               | 140                                                                                                   | 16.05 (5.16, 26.94)*                                                             | 0.92 (0.00, 1.86)*                                                           |

\*Weighed average according to the population sizes of each sewershed zone.

**Supplementary Note 2. Studied wastewater treatment plant zones (sewersheds), Jefferson County, KY (USA).**

The five wastewater treatment plant zones (sewersheds) from this study for Jefferson County, KY (USA) are presented in Supplementary Figure 1 and sewershed characteristics are presented in Supplementary Table 2.

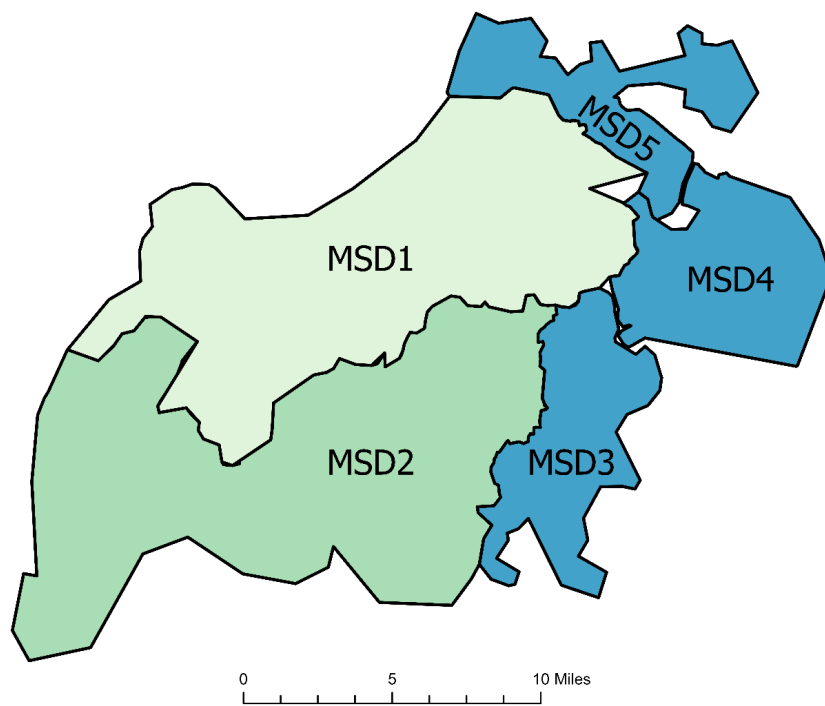

Supplementary Figure 1. **Studied wastewater treatment plant sewersheds, Jefferson County, Kentucky (USA).**

Supplementary Table 2. **Characteristics of studied wastewater treatment plant sewersheds of Jefferson County, KY (USA).**

| <b>Sewershed</b>                                        | <b>Income (US\$)<sup>a</sup></b> | <b>Population<sup>a</sup></b> | <b>Area (km<sup>2</sup>)</b> | <b>Combined sewer<sup>b</sup></b> |
|---------------------------------------------------------|----------------------------------|-------------------------------|------------------------------|-----------------------------------|
| MSD1<br>Morris Forman Water Quality Treatment Center    | 54,138                           | 349,850                       | 280                          | Yes                               |
| MSD2<br>Derek R. Guthrie Water Quality Treatment Center | 53,577                           | 295,910                       | 332                          | No                                |
| MSD3<br>Cedar Creek Water Quality Treatment Center      | 76,606                           | 55,928                        | 80                           | No                                |
| MSD4<br>Floyds Fork Water Quality Treatment Center      | 113,699                          | 32,460                        | 88                           | No                                |
| MSD5<br>Hite Creek Water Quality Treatment Center       | 106,769                          | 31,269                        | 67                           | No                                |

<sup>a</sup>Based on 2018 U.S Census Bureau American Community Survey (ACS) block group data aggregated to the wastewater catchment areas with overlapping block group centroids. Income is mean median household. Wastewater site selection is presented in Yeager et al.<sup>1</sup>

<sup>b</sup>Combined sewers include wastewater and stormwater and SARS-CoV-2 concentrations may be expected to fluctuate more as a result.

**Supplementary Note 3. Wastewater variant detection.**

The wastewater variant detection from the time period of this study for Jefferson County, KY (USA) are presented in Supplementary Figure 2 and Supplementary Table 3.



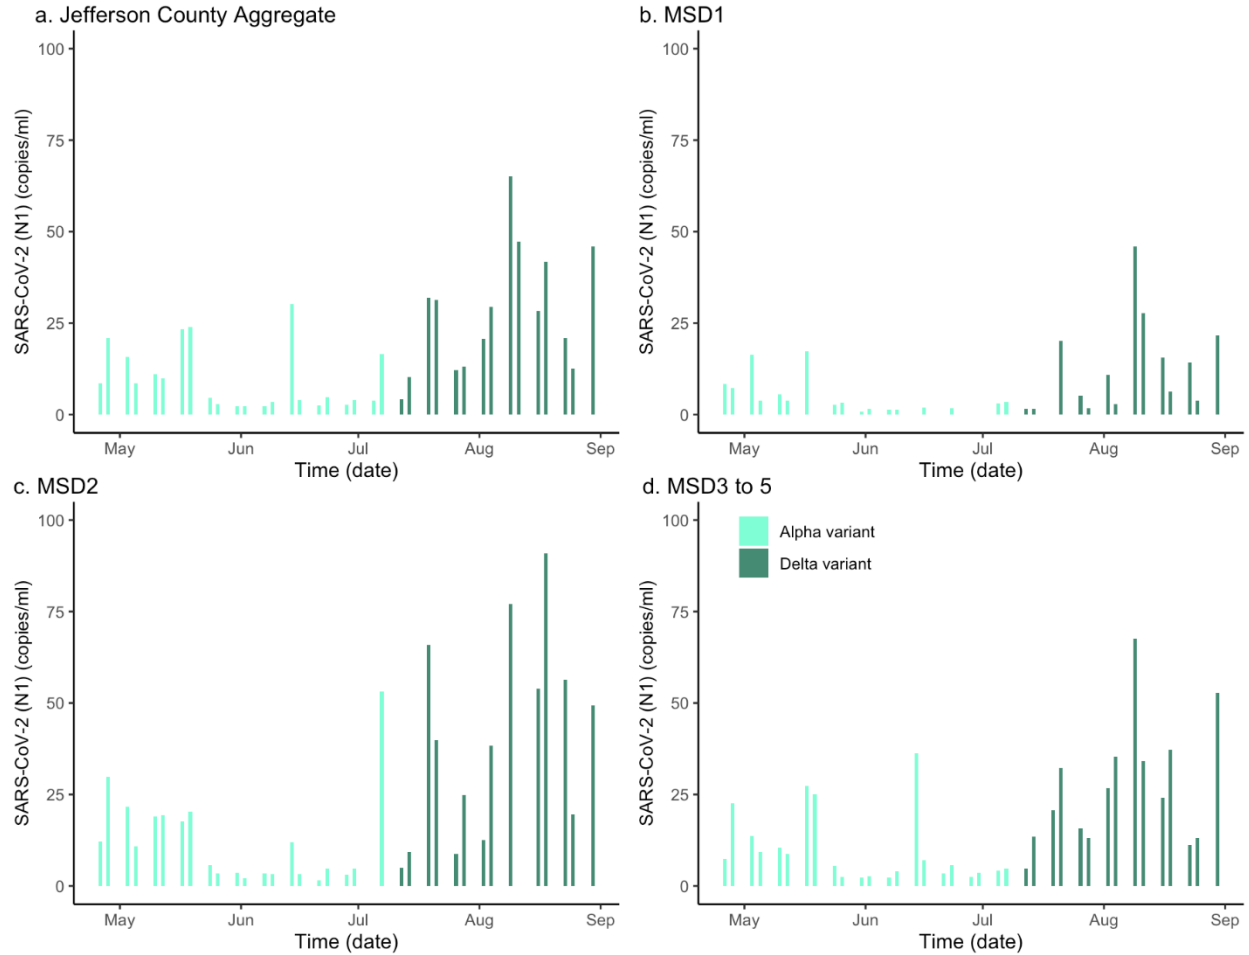

Supplementary Figure 2. **SARS-CoV-2 (N1) wastewater concentration in sewersheds of Jefferson County, KY (USA)**. The wastewater concentrations during Alpha and Delta variants are represented in bars (light green for Alpha variant, dark green for Delta variant). The panels compare aggregated concentration for Jefferson County (Panel a) as well as stratified by sewershed (Panels b–d).

Supplementary Table 3. **Periods of Alpha and Delta variant wastewater dominance in sewersheds of Jefferson County, KY (USA).** Dates determined by shift in major variant based on sampling schedule of wastewater collection.

| <b>Sewershed</b> | <b>Alpha dominant in wastewater</b> |                 | <b>Delta dominant in wastewater</b> |                 |
|------------------|-------------------------------------|-----------------|-------------------------------------|-----------------|
|                  | <b>Start date</b>                   | <b>End date</b> | <b>Start date</b>                   | <b>End date</b> |
| MSD1             | 3/30/21                             | 5/17/21         | 7/12/21                             | 8/30/21         |
| MSD2             | 3/30/21                             | 5/24/21         | 7/12/21                             | 8/30/21         |
| MSD3             | 3/30/21                             | 6/21/21         | 7/19/21                             | 8/30/21         |
| MSD4             | 3/30/21                             | 7/5/21          | 7/19/21                             | 8/30/21         |
| MSD5             | 3/30/21                             | 6/28/21         | 7/26/21                             | 8/30/21         |

### Supplementary Note 4. Population vaccination model (SVI<sub>2</sub>RT).

#### Analytical model

The equation shown in (1) describes the time-evolution of the proportions of individuals who are susceptible ( $S$ ), vaccinated ( $V$ ), infected with Alpha variant ( $I_1$ ), infected with Delta variant ( $I_2$ ) removed ( $R$ ), and seropositive ( $T$ ).<sup>2</sup> We assume the total initial population of susceptibles is large with a small initial fraction of infected. The model equations are:

$$\begin{aligned} \dot{S}_t &= -\beta S_t I_t^{(1)} - \beta^* S_t I_t^{(2)} - \alpha_t S_t, \\ \dot{V}_t &= \alpha_t S_t - \tilde{\beta} I_t^{(1)} V_t - \tilde{\beta}^* I_t^{(2)} V_t \\ \dot{I}_t^{(1)} &= \beta S_t I_t^{(1)} + \tilde{\beta} I_t^{(1)} V_t - \gamma I_t^{(1)}, \\ \dot{I}_t^{(2)} &= \beta^* S_t I_t^{(2)} + \tilde{\beta}^* I_t^{(2)} V_t - \gamma I_t^{(2)} \\ \dot{R}_t &= \gamma I_t^{(1)} + \gamma I_t^{(2)} - \delta R_t, \\ \dot{T}_t &= \delta R_t, \end{aligned} \quad (1)$$

with the initial condition  $S_0 = 1 - \rho(1.001) - \epsilon - \psi > 0$ ,  $V_0 = 0$ ,  $I_0^{(1)} = \rho > 0$ ,  $I_0^{(2)} = \rho/1000$ ,  $R_0 = \epsilon > 0$ , and  $T_0 = \psi > 0$ .

Here,  $\beta$  and  $\tilde{\beta}$  are the rates of infection of respectively, unvaccinated and vaccinated, and  $\beta^*$  and  $\tilde{\beta}^*$  are the rates of infection according to Delta variant. As our compartment model has two infection compartments, it is called the variant competition model.<sup>3</sup> The observed data in this analysis do not have any information about infection from the Delta variant, and an increase in the number of parameters makes model estimation difficult and may lead to identifiability problems. So, we set  $\beta^*$  and  $\tilde{\beta}^*$  at the values 50% higher than  $\beta$  and  $\tilde{\beta}$ .<sup>4</sup> The function of  $\alpha_t$  represents a changing rate of vaccination over time. The vaccination process may be changed according to a policy or vaccine supply, so we set the vaccination rate  $\alpha_t$  to match the empirical percentage of the vaccinated population in Jefferson County at the end of August 2021. Additionally,  $\gamma$  is the rate of recovery, and  $\delta$  is the rate at which antibodies build to a detectable level after recovery. The SVI<sub>2</sub>RT model parameters to be estimated are given by the vector  $\theta = (\beta, \tilde{\beta}, \gamma, \delta, \rho, \epsilon, \psi)$ .

To obtain the serial estimates of incidence and prevalence from the observed seropositivity levels in four waves of testing, we adapt the idea of an ODE-based survival model proposed recently.<sup>5,6</sup> According to that model, the scaled quantities  $S_t, V_t, I_t^{(1)}, I_t^{(2)}, R_t, T_t$  may be considered as respective probabilities of a randomly selected individual in a large population, being either susceptible, vaccinated, infected with different virus variants, recovered, or seroprevalent at time  $t$ . Consequently, we consider the results  $Z(t)$  of all individual antibody-based tests conducted at times  $t$  as independent Bernoulli variables:

$$Z(t) \sim \text{Ber}(T_t^*),$$

where  $T_t^* = \text{sens} T_t + (1 - \text{spe})(1 - T_t)$  is the specificity adjusted probability of a positive test. For our analysis, both *sens* and *spe* are additional parameters to be estimated. We assigned the informative priors to *sens* and *spe* from available clinical data.

Assuming at time  $t$ ,  $n_t$  individuals are tested with  $k_t$  having positive results, the corresponding log-likelihood function is:

$$\ell_t(\Theta) \propto k_t \log(T_t) + (n_t - k_t) \log(1 - T_t), \quad (2)$$

where  $\Theta = (\beta, \tilde{\beta}, \gamma, \delta, \rho, \epsilon, \psi, spe, sens)$  is the vector of parameters to be identified.

Given the testing data at  $m \geq 1$  time points  $t_1, \dots, t_m$ , we then aim to find parameter values  $\theta$  that maximizes the posterior log-likelihood function:

$$\tilde{\ell}(\Theta) \propto \sum_{i=1}^m \ell_{t_i}(\Theta) + \log p(\Theta), \quad (3)$$

where  $p(\Theta)$  is the prior distribution on  $\Theta$  to be determined from our previous work.<sup>5,6</sup> Hence, we seek the values of  $\Theta$  that maximize our posterior log-likelihood function (3). The entire system (1) must be solved for each parameter combination.

#### *Incidence, prevalence, and seroprevalence estimation*

Posterior serial estimates of the relative rates of incidence, prevalence, and seropositivity were obtained from the *SVI<sub>2</sub>RT* model as the time-dependent vector:

$$\text{Pred}_t = (-\dot{S}_t, V_t, I_t^{(1)}, I_t^{(2)}, T_t). \quad (4)$$

Here  $(S_t, V_t, I_t^{(1)}, I_t^{(2)}, T_t)$  is the family of trajectories of (1) evaluated at the posterior distribution of the vector  $\Theta$ . In practice, the distribution of  $\text{Pred}_t$  is approximated by taking a random sample of size  $m$  from the converged MCMC sampler. In our case  $m = 2000$ . To obtain daily incidence rates ( $\text{Inc}_d$ ) we have used the approximation  $\dot{S}_t \approx S_{t+1} - S_t$  and consequently took  $\text{Inc}_d = S_d - S_{d+1}$  where  $d$  corresponds to a specific day of interest. The estimated prediction counts were obtained by multiplying the rates in  $\text{Pred}_t$  by the appropriate population numbers.

Supplementary Table 4. **Posterior mean estimates of the  $SVI_2RT$  model parameters in sewersheds of Jefferson County, KY (USA).** The area-specific Hamiltonian Markov chain Monte Carlo (MCMC) posterior estimates are based on seropositivity data aggregated across Jefferson County and stratified by sewersheds. The corresponding 95% credible bounds are provided in parenthesis. The results are based on MCMC implemented via *Rstan* library, with a 6000- and 2000-step burn-in.

|                    | Jefferson County<br>Aggregated                                                   | MSD1                                                                             | MSD2                                                                             | MSD3–5                                                                           |
|--------------------|----------------------------------------------------------------------------------|----------------------------------------------------------------------------------|----------------------------------------------------------------------------------|----------------------------------------------------------------------------------|
| $\beta$            | 0.384 (0.301, 0.449)                                                             | 0.375 (0.282, 0.443)                                                             | 0.314 (0.234, 0.374)                                                             | 0.353 (0.259, 0.427)                                                             |
| $\alpha$           | $8.813 \times 10^{-3}$ (64%)                                                     | 0.010 (67%)                                                                      | $6.600 \times 10^{-3}$ (55%)                                                     | 0.013 (76%)                                                                      |
| $\tilde{\beta}$    | 0.317 (0.235, 0.381)                                                             | 0.322 (0.238, 0.389)                                                             | 0.303 (0.207, 0.380)                                                             | 0.330 (0.249, 0.400)                                                             |
| $\gamma$           | 0.432 (0.340, 0.502)                                                             | 0.418 (0.325, 0.486)                                                             | 0.388<br>(0.294, 0.460)                                                          | 0.411 (0.324, 0.481)                                                             |
| $\delta$           | 0.103 (0.063, 0.137)                                                             | 0.102 (0.067, 0.133)                                                             | 0.104 (0.067, 0.135)                                                             | 0.103 (0.066, 0.133)                                                             |
| $\rho$             | $1.106 \times 10^{-3}$<br>( $3.903 \times 10^{-4}$ ,<br>$1.820 \times 10^{-3}$ ) | $1.199 \times 10^{-3}$<br>( $5.904 \times 10^{-4}$ ,<br>$1.744 \times 10^{-3}$ ) | $1.097 \times 10^{-3}$<br>( $3.941 \times 10^{-4}$ ,<br>$1.851 \times 10^{-3}$ ) | $1.160 \times 10^{-3}$<br>( $5.757 \times 10^{-4}$ ,<br>$1.688 \times 10^{-4}$ ) |
| $\epsilon$         | $1.545 \times 10^{-3}$<br>( $1.493 \times 10^{-4}$ ,<br>$3.441 \times 10^{-3}$ ) | $1.659 \times 10^{-3}$<br>( $1.465 \times 10^{-4}$ ,<br>$3.732 \times 10^{-3}$ ) | $1.630 \times 10^{-3}$<br>( $1.586 \times 10^{-4}$ ,<br>$3.562 \times 10^{-3}$ ) | $1.648 \times 10^{-3}$<br>( $1.324 \times 10^{-4}$ ,<br>$3.587 \times 10^{-3}$ ) |
| $\psi$             | 0.0222 (0.0182, 0.0253)                                                          | 0.0222 (0.0183, 0.0253)                                                          | 0.0224 (0.0187, 0.0254)                                                          | 0.0223 (0.0184, 0.0254)                                                          |
| <b>Specificity</b> | 0.946 (0.934, 0.954)                                                             | 0.957 (0.941, 0.969)                                                             | 0.931 (0.909, 0.945)                                                             | 0.931 (0.904, 0.949)                                                             |
| <b>Sensitivity</b> | 0.632 (0.540, 0.699)                                                             | 0.635 (0.543, 0.704)                                                             | 0.644 (0.548, 0.708)                                                             | 0.640 (0.549, 0.704)                                                             |

Supplementary Table 5. **The prior distribution specifications for the  $SVI_2RT$  model.** Parameters were given Gamma prior distributions, with hyper-parameters  $(a, b)$ .

| <b>Gamma (a, b)</b> | $\beta$ | $\tilde{\beta}$ | $\gamma$ | $\delta$ | $\rho$ | $\varepsilon$ | $\psi$  | <b>Specificity</b> | <b>Sensitivity</b> |
|---------------------|---------|-----------------|----------|----------|--------|---------------|---------|--------------------|--------------------|
| <i>a</i>            | 40.97   | 40.97           | 21.80    | 24.29    | 5.57   | 1.74          | 112.5   | 21.7               | 71                 |
| <i>b</i>            | 92.32   | 92.32           | 90.32    | 232.00   | 4648   | 1039.09       | 5035.15 | 3.83               | 38.3               |

Supplementary Table 6. **Summary of the Bayesian broken stick regression results in sewersheds of Jefferson County, KY (USA).** Dispersion ( $\sigma$ ) is the standard deviation of the error term of the linear regression.

| Sewershed                   | Parameters              | Linear regression model                                                      |
|-----------------------------|-------------------------|------------------------------------------------------------------------------|
|                             |                         | Posterior mean (95% credible interval)                                       |
| Jefferson County Aggregated | Intercept               | $-4.222 \times 10^{-4}$ ( $-9.458 \times 10^{-4}$ , $7.921 \times 10^{-5}$ ) |
|                             | Alpha variant           | 0.815 (-0.023, 1.717)                                                        |
|                             | Delta variant           | 0.385 (0.318, 0.455)                                                         |
|                             | Dispersion ( $\sigma$ ) | $6.483 \times 10^{-4}$ ( $4.543 \times 10^{-4}$ , $9.490 \times 10^{-4}$ )   |
| MSD1                        | Intercept               | $-7.012 \times 10^{-4}$ ( $-1.385 \times 10^{-3}$ , $1.493 \times 10^{-5}$ ) |
|                             | Alpha variant           | 1.126 (0.096, 2.112)                                                         |
|                             | Delta variant           | 0.240 (0.181, 0.296)                                                         |
|                             | Dispersion ( $\sigma$ ) | $8.153 \times 10^{-4}$ ( $5.739 \times 10^{-4}$ , $1.186 \times 10^{-3}$ )   |
| MSD2                        | Intercept               | $-2.099 \times 10^{-4}$ ( $-8.447 \times 10^{-4}$ , $4170 \times 10^{-4}$ )  |
|                             | Alpha variant           | 0.881 (-0.325, 2.073)                                                        |
|                             | Delta variant           | 0.557 (0.482, 0.631)                                                         |
|                             | Dispersion ( $\sigma$ ) | $8.939 \times 10^{-4}$ ( $6.330 \times 10^{-4}$ , $1.300 \times 10^{-3}$ )   |
| MSD3–5                      | Intercept               | $-2.963 \times 10^{-4}$ ( $-7.426 \times 10^{-4}$ , $1.508 \times 10^{-4}$ ) |
|                             | Alpha variant           | 0.630 (-0.155, 1.434)                                                        |
|                             | Delta variant           | 0.201 (0.163, 0.240)                                                         |
|                             | Dispersion ( $\sigma$ ) | $5.635 \times 10^{-4}$ ( $3.961 \times 10^{-4}$ , $8.323 \times 10^{-4}$ )   |

Supplementary Table 7. **Sensitivity analysis.** The transmission rates of the Delta variant, denoted as  $\beta^*$ , set to 120%, 150%, 200%, 250%, and 300% of the transmission rate of the Alpha variant, denoted as  $\beta$ . The second column represents the corresponding increases in the basic reproduction numbers.

| Increasing amount of transmission rate<br>of Delta variant | $R_0$ |
|------------------------------------------------------------|-------|
| 1.2                                                        | 1.06  |
| 1.5                                                        | 1.33  |
| 2.0                                                        | 1.78  |
| 2.5                                                        | 2.22  |
| 3.0                                                        | 2.67  |



Supplementary Table 8. **Summary of the effects of the vaccination and Delta variant in sewersheds of Jefferson County, KY (USA).** Percentage reduction due to vaccination effect or excess due to Delta variant on estimates of wastewater concentration and incidence rate. In parenthesis is the lower and upper bounds of 95% credible interval.

|                                             |            | <b>Jefferson County<br/>Aggregated</b> | <b>MSD1</b>             | <b>MSD2</b>          | <b>MSD3–5</b>           |
|---------------------------------------------|------------|----------------------------------------|-------------------------|----------------------|-------------------------|
| Vaccination effect with<br>Delta variant    | Wastewater | 218.9 (193.5, 242.4)                   | 123.1 (105.0,<br>144.0) | 202.8 (192.8, 203.4) | 166.9 (146.8,<br>187.1) |
|                                             | Incidence  | 156.2 (95.2, 175.7)                    | 99.4 (94.2, 108.5)      | 154.5 (3.2, 154.7)   | 108.8 (52.8,<br>109.2)  |
| Vaccination effect<br>without Delta variant | Wastewater | 44.1 (36.0, 49.9)                      | 81.5 (77.6, 86.1)       | 5.7 (2.7, 12.6)      | 102.0 (66.5,<br>142.8)  |
|                                             | Incidence  | 60.3 (22.8, 62.8)                      | 96.9 (25.2, 107.4)      | 36.3 (4.0, 37.7)     | 113.3 (14.0,<br>117.5)  |
| Delta variant effect with<br>vaccination    | Wastewater | 88.4 (87.7, 88.7)                      | 82.4 (81.4, 84.0)       | 89.7 (88.5, 90.8)    | 88.3 (87.3, 89.1)       |
|                                             | Incidence  | 95.8 (95.7, 95.9)                      | 96.8 (95.5, 96.8)       | 95.8 (2.7, 96.0)     | 97.0 (38.6, 97.1)       |
| Delta variant effect without<br>vaccination | Wastewater | 94.5 (93.3, 95.3)                      | 85.7 (83.7, 87.9)       | 95.8 (94.9, 96.7)    | 91.0 (90.7, 91.2)       |
|                                             | Incidence  | 97.6 (34.0, 97.7)                      | 96.9 (8.2, 97.0)        | 98.0 (0.5, 98.0)     | 97.0 (1.1, 97.1)        |

Supplementary Table 9. **Summary of the effects of the vaccination and Delta variant in sewersheds of Jefferson County, KY (USA).** The absolute values of difference between estimated wastewater concentrations and incidences due to vaccination effect or Delta variant. In parenthesis is the lower and upper bounds of the 95% credible interval.

|                                             |            | <b>Jefferson County<br/>Aggregated</b> | <b>MSD1</b>          | <b>MSD2</b>          | <b>MSD3–5</b>        |
|---------------------------------------------|------------|----------------------------------------|----------------------|----------------------|----------------------|
| Vaccination effect with<br>Delta variant    | Wastewater | 0.419 (0.377, 0.463)                   | 0.266 (0.236, 0.296) | 0.486 (0.456, 0.518) | 0.250 (0.223, 0.277) |
|                                             | Incidence  | 0.410 (0.035, 0.837)                   | 0.382 (0.033, 0.797) | 0.301 (0.000, 0.603) | 0.413 (0.001, 0.826) |
| Vaccination effect<br>without Delta variant | Wastewater | 0.010 (0.008, 0.013)                   | 0.033 (0.030, 0.035) | 0.002 (0.001, 0.004) | 0.019 (0.014, 0.024) |
|                                             | Incidence  | 0.006 (0.000, 0.012)                   | 0.011 (0.000, 0.023) | 0.003 (0.000, 0.005) | 0.012 (0.000, 0.025) |
| Delta variant effect with<br>vaccination    | Wastewater | 0.182 (0.180, 0.185)                   | 0.190 (0.183, 0.197) | 0.233 (0.230, 0.237) | 0.142 (0.140, 0.143) |
|                                             | Incidence  | 0.246 (0.035, 0.456)                   | 0.372 (0.033, 0.711) | 0.187 (0.000, 0.374) | 0.362 (0.001, 0.724) |
| Delta variant effect without<br>vaccination | Wastewater | 0.583 (0.541, 0.628)                   | 0.440 (0.412, 0.470) | 0.654 (0.625, 0.684) | 0.384 (0.362, 0.406) |
|                                             | Incidence  | 0.642 (0.001, 1.82)                    | 0.739 (0.000, 1.478) | 0.486 (0.000, 0.972) | 0.767 (0.000, 1.534) |

Supplementary Table 10. **Vaccination effect of the incidence estimation of Jefferson County, KY (USA).** The absolute values of differences between cumulative number of the estimated incidences due to vaccination effect or Delta variant effect<sup>0</sup>. In parenthesis is the lower and upper bounds of 95% credible interval. For comparison between sewershed zone is the estimated incidence per 10<sup>5</sup> population.

|           |               | <b>Jefferson County<br/>Aggregated</b> | <b>MSD1</b>            | <b>MSD2</b>        | <b>MSD3–5</b>       |
|-----------|---------------|----------------------------------------|------------------------|--------------------|---------------------|
| Incidence | Vaccination   | 40,085 (3,507, 83,678)                 | 38,205 (3,264, 79,673) | 30,146 (1, 60,293) | 40,663 (70, 81,361) |
|           | Delta variant | 24,567 (3,534, 45,601)                 | 37,210 (3,309, 71,111) | 18,693 (1, 37385)  | 36,210 (70, 72,351) |

Supplementary Table 11. **Correlation coefficients and 95% credible intervals between wastewater concentration and the estimated prevalence from the Alpha variant mutation in sewersheds of Jefferson County, KY (USA).**

|           |             | <b>Jefferson County<br/>Aggregated</b> | <b>MSD1</b>                 | <b>MSD2</b>             | <b>MSD3-5</b>               |
|-----------|-------------|----------------------------------------|-----------------------------|-------------------------|-----------------------------|
| Incidence | Vaccination | 0.51185 (-0.3296,<br>0.9427)           | 0.5773 (-0.2731,<br>0.9431) | 0.9105 (0.6217, 0.9914) | 0.1243 (-0.6859,<br>0.8364) |

Supplementary Table 12. **Simple linear regression model for the hospitalization rate on the observed weekly average of wastewater concentration.**

| <b>Response</b>         | <b>Parameters</b>           | <b>Estimate</b>           | <b>Std.</b>               | <b>t statistic</b> | <b>P-value</b> |
|-------------------------|-----------------------------|---------------------------|---------------------------|--------------------|----------------|
| Hospitalization<br>rate | Intercept                   | 1.284<br>$\times 10^{-4}$ | 2.729<br>$\times 10^{-5}$ | 4.705              | 0.0002         |
|                         | Wastewater<br>concentration | 0.1762                    | 0.0119                    | 14.835             | 0.0000         |

Supplementary Table 13. **A simulation study summary for hierarchical regression.** Each regression model was fitted using random sample data. Sample portions considered are: 100%, 83%, 67%, 50% and 33%.

| <b>Percentage</b> | <b><math>R^2</math></b> | <b>F statistics</b> | <b>P-value</b>          |
|-------------------|-------------------------|---------------------|-------------------------|
| 100               | 0.9000                  | 145.5               | $9.273 \times 10^{-10}$ |
| 83                | 0.8842                  | 99.26               | $1.878 \times 10^{-7}$  |
| 67                | 0.8411                  | 52.93               | $2.679 \times 10^{-5}$  |
| 50                | 0.7735                  | 23.90               | $1.775 \times 10^{-3}$  |
| 33                | 0.2095                  | 1.06                | 0.3614                  |

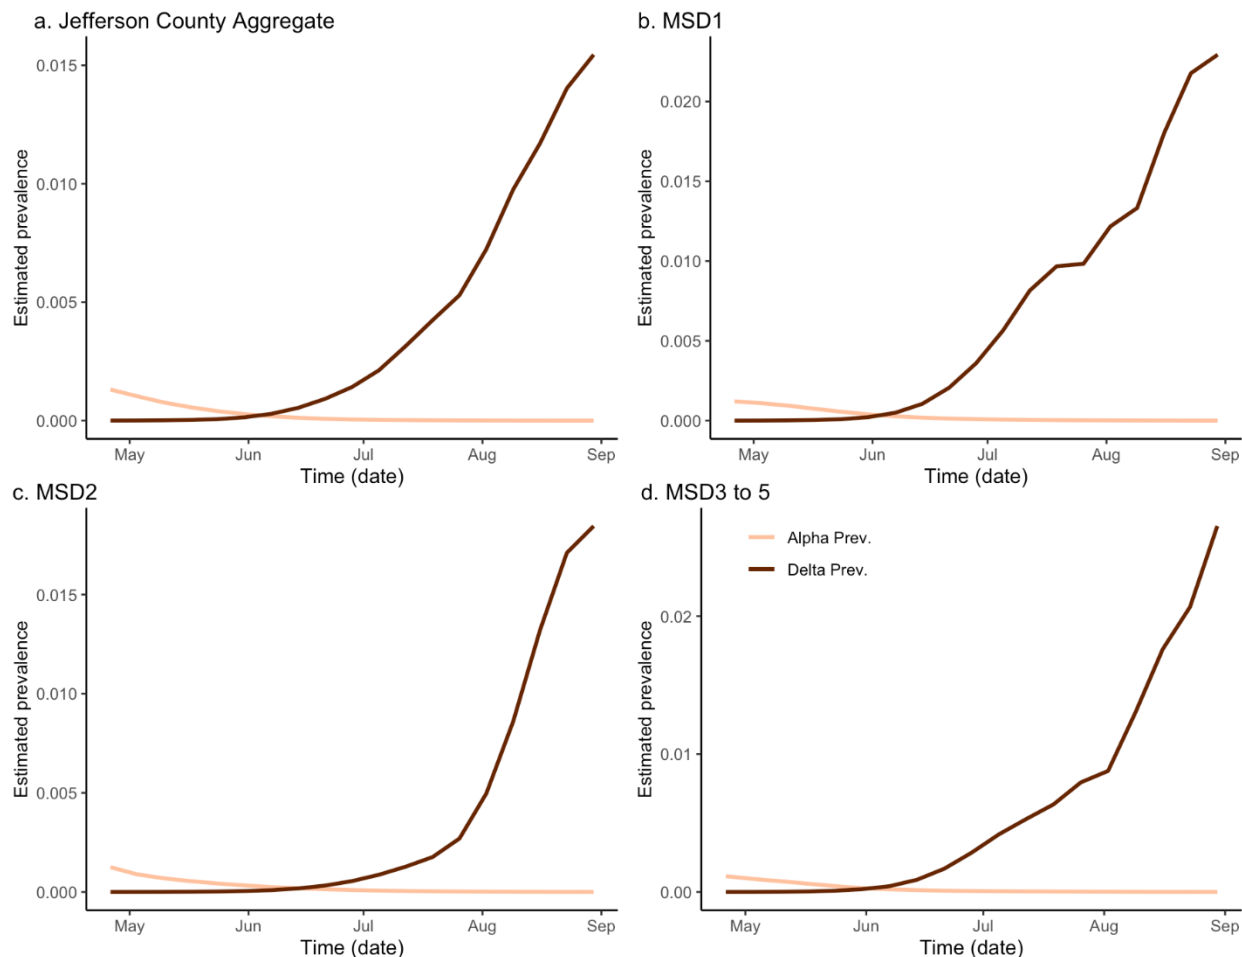

Supplementary Figure 3. **Estimated prevalence for SARS-CoV-2 Alpha and Delta variants in sewersheds of Jefferson County, KY (USA).** Estimated prevalence of the Alpha and Delta variants by the  $SVI_2RT$  model. Two estimated prevalence lines crosses on 5 June 2021 (for Panels a, b, and d) and 15 June 2021 (for Panel c), corresponding to the middle of the period of the Alpha variant being dominant. The panels compare prevalence for Jefferson County (Panel a), as well as stratified by sewer shed (Panels b–d).

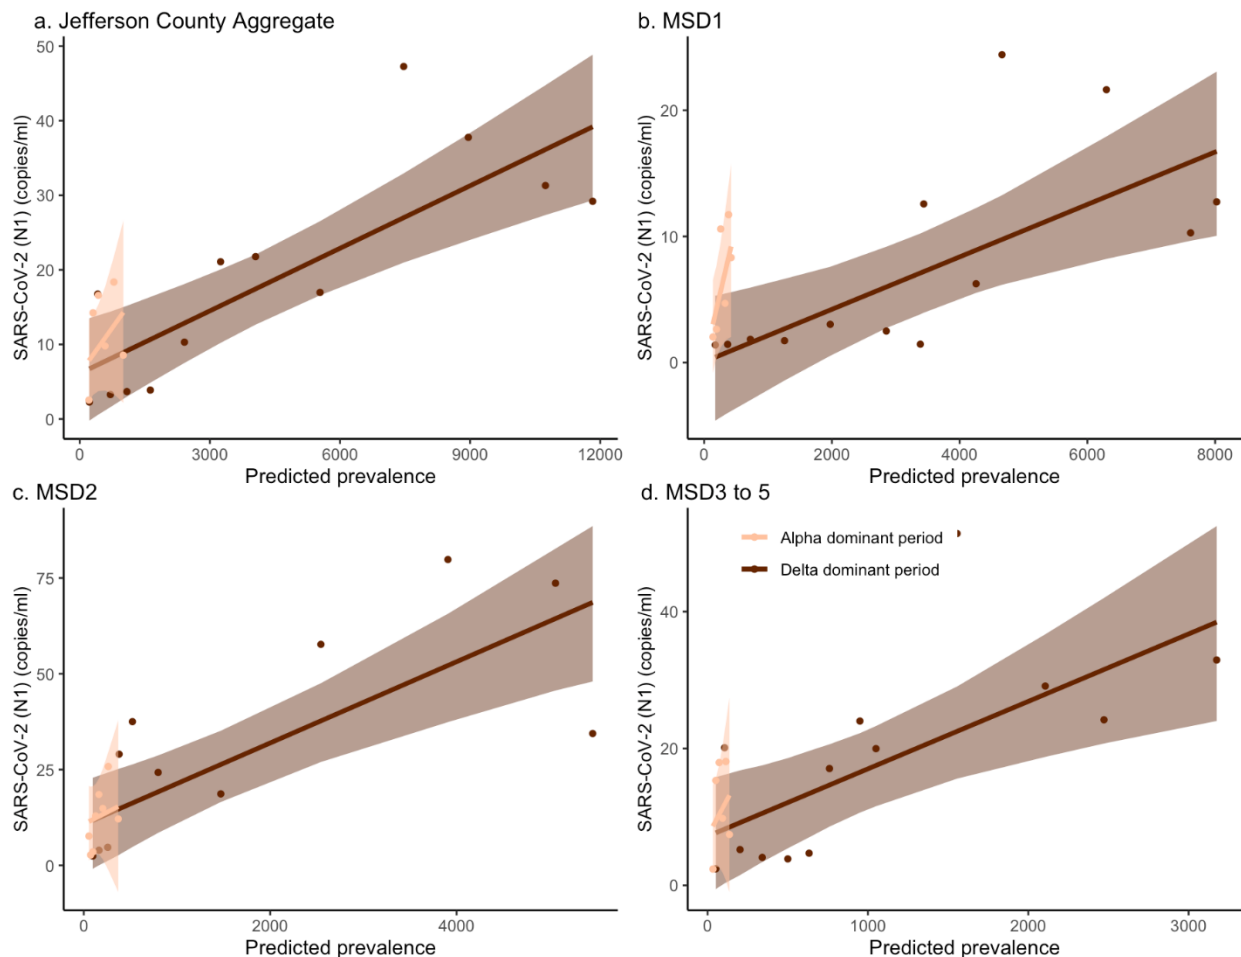

Supplementary Figure 4. **Prevalence versus SARS-CoV-2 (N1) wastewater concentration in sewersheds of Jefferson County, KY (USA).** Bayesian regression between predicted weekly prevalence of SARS-CoV-2 infections from the Alpha and Delta variants and wastewater in the entire Jefferson County (Panel a) as well as stratified by sewershed (Panels b–d). The darker straight line is the fitted Bayesian regression line for the Delta variant. The darker shade marks the 95% credible interval: the lighter line and shade mark for the Alpha variant. The data points for the Alpha variant are minor (6 for Panels a, b, and d, 8 for Panel c).



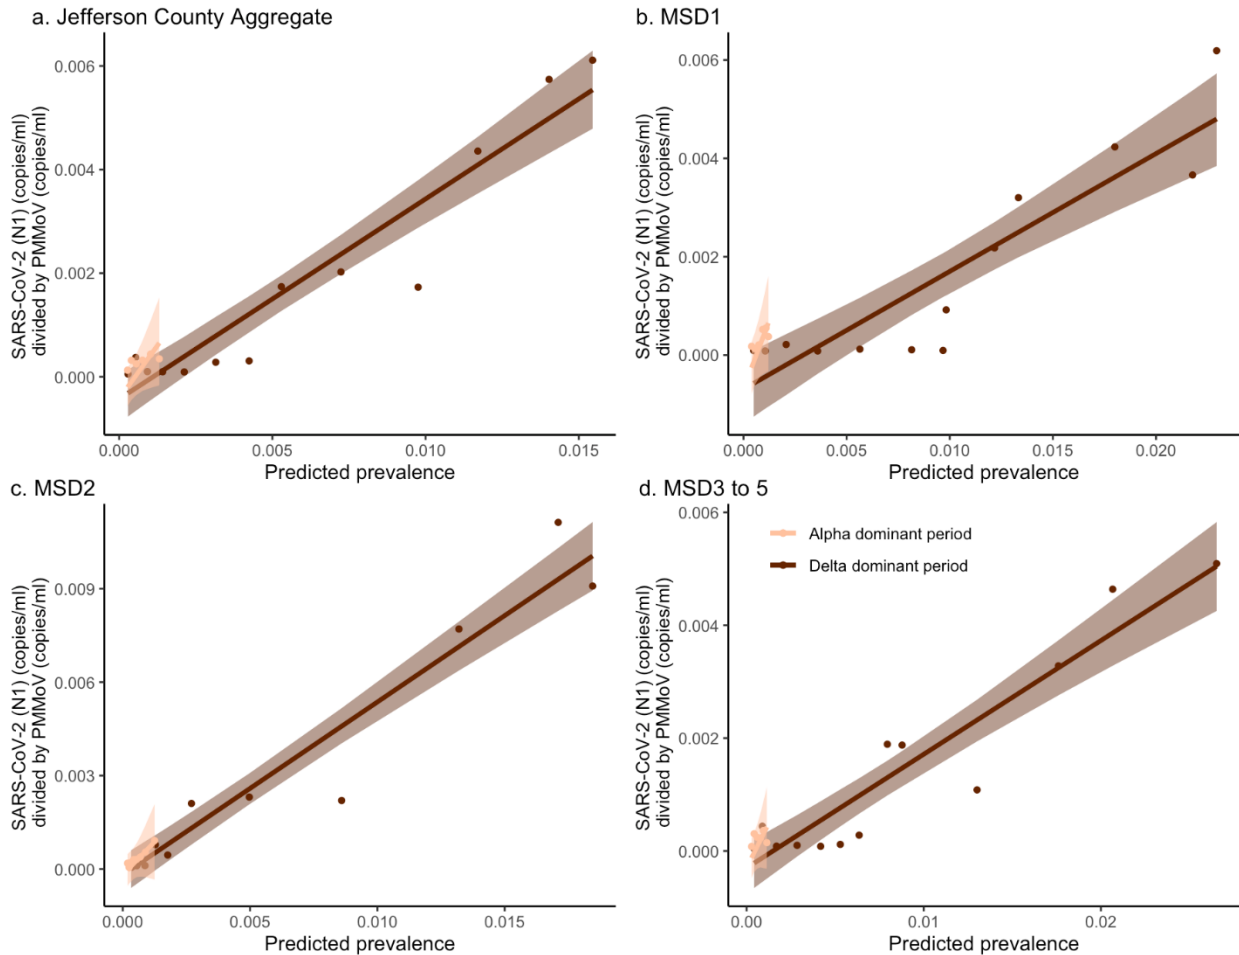

Supplementary Figure 5. **Prevalence versus wastewater SARS-CoV-2 (N1) normalized by pepper mild mottle virus concentration in sewersheds of Jefferson County, KY (USA).** Bayesian regression between predicted weekly prevalence of SARS-CoV-2 infections from the Alpha and Delta variants and wastewater in the entire Jefferson County (Panel a) as well as stratified by sewershed (Panels b–d). The darker straight line is the fitted Bayesian regression line for the Delta variant. The darker shade marks the 95% credible interval: the lighter line and shade mark for the Alpha variant. The data points for the Alpha variant are very few (6 for Panels a, b, and d, 8 for Panel c).



Supplementary Figure 6. **The estimated effect of vaccination on SARS-CoV-2 (N1) wastewater concentration in sewersheds of Jefferson County, KY (USA).** The dark brown line is the regression-based fit to the wastewater concentration and the light brown line is the prediction of wastewater concentration using synthetic prevalence from the  $SVI_2RT$  model with the Delta variant effect zeroed out. The shaded areas represent 95% credible intervals. The blue dots are observed weekly average wastewater concentration. The panels compare the variant effect on wastewater concentration for Jefferson County (Panel a) as well as stratified by sewershed (Panels b–d).

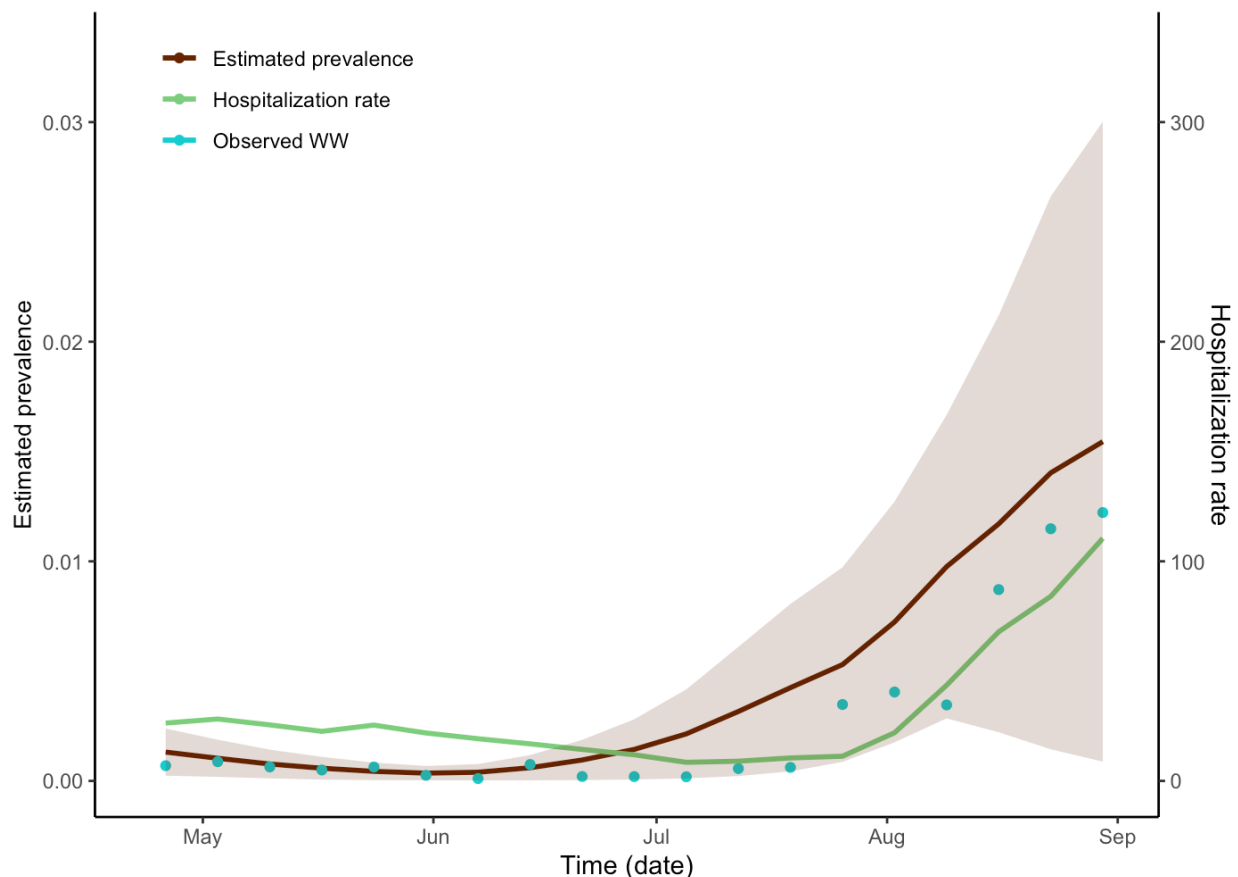

Supplementary Figure 7. **SARS-CoV-2 prevalence and hospitalizations versus SARS-CoV-2 (N1) wastewater concentration normalized by pepper mild mottle virus, Jefferson County, KY (USA).** Relationship among observed wastewater concentration, the hospitalization rate, and estimated prevalence. The dark brown line represents the estimated prevalence, and the shaded area is the 95% credible interval of MCMC simulation. The green line is the weekly average of daily hospitalization rate of Jefferson County, and the blue dots represent the weekly average of wastewater concentrations. The Pearson correlation coefficient of estimated prevalence and wastewater concentration is 0.858 (95% CI = (0.502, 0.975)) and that of hospitalization rate and wastewater concentration is 0.722 (95% CI = (0.216, 0.955)).

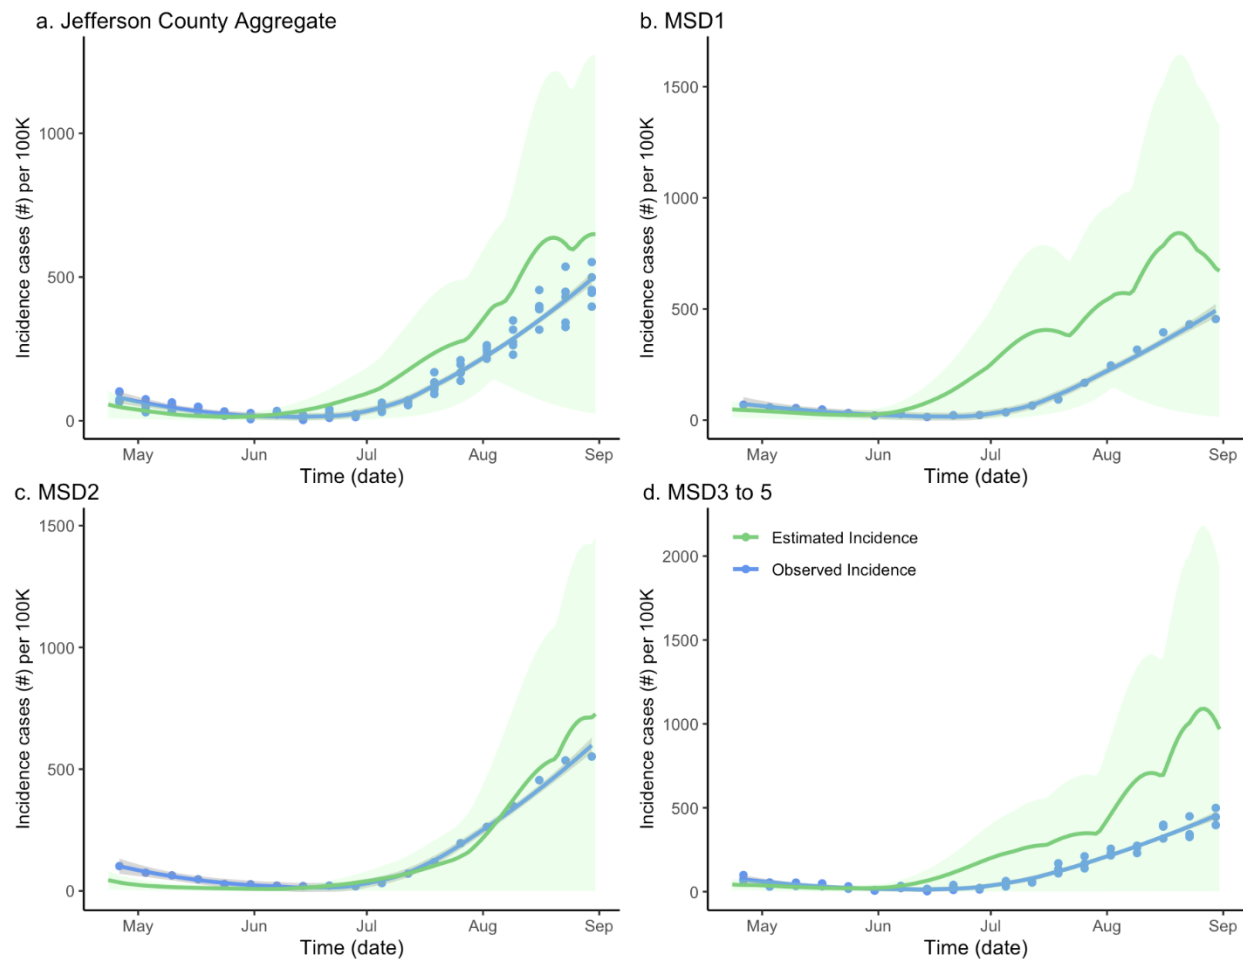

Supplementary Figure 8. **Clinical versus estimated incidence in sewersheds of Jefferson County, KY (USA).** Posterior density and credibility bounds (green curve) of the weekly aggregated incidence rate as predicted by the  $SVI_2RT$  model compared to official weekly incidence for Jefferson County (blue dots and trend line) as reported by the Jefferson County Health Department. The model plots are based on Hamiltonian MCMC samples, with 6000 steps and 2000 steps burn-in period. The panels compare aggregated incidence for Jefferson County (Panel a) as well as stratified by sewershed (Panels b–d).

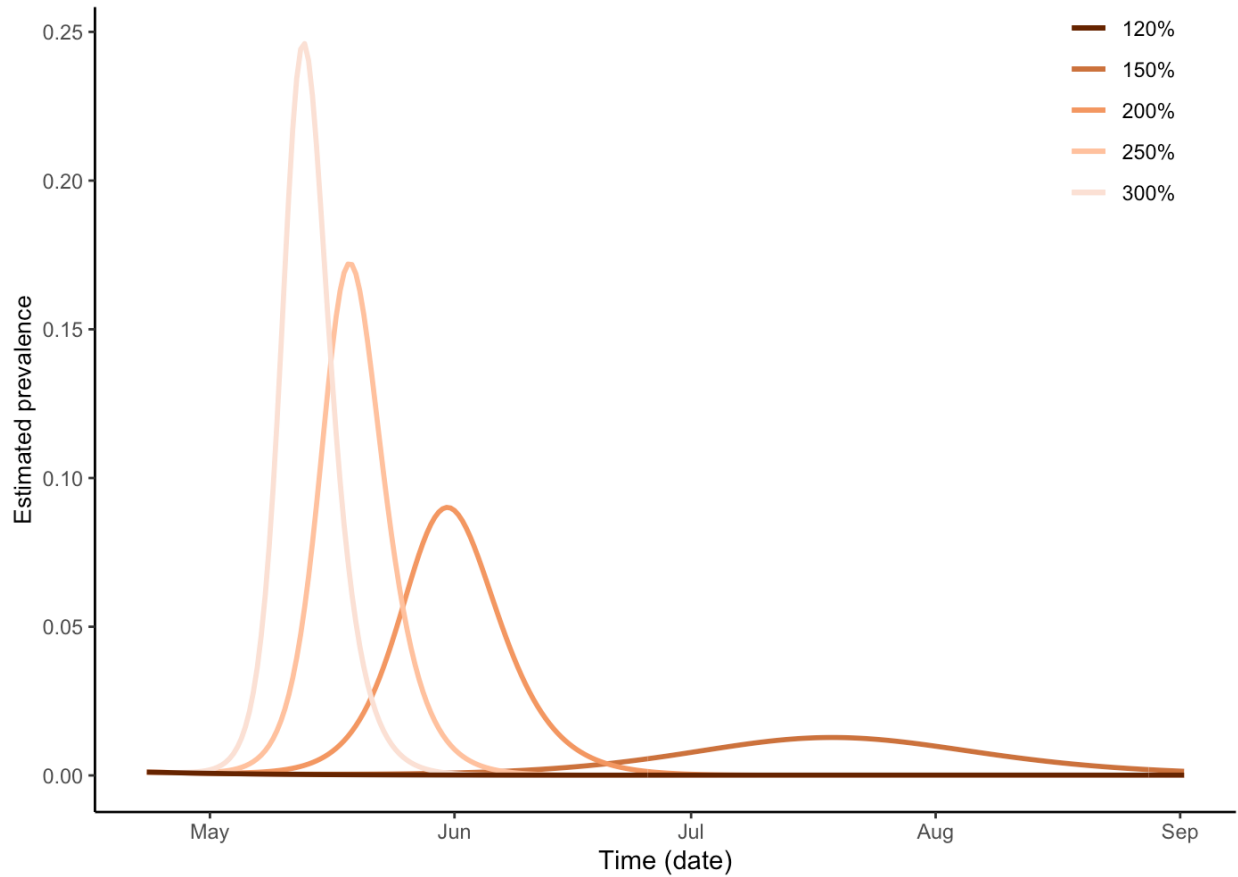

Supplementary Figure 9. **Sensitivity analysis for change of prevalence according to the change of transmission rate  $\beta^*$  for Delta variant.** The amount of the transmission rate for Delta variant are set from 120% to 300% which is as large as the Alpha variant transmission rate. The corresponding basic reproduction numbers are seen to change from 1.3 for 120% to 3.2 for 300%.

*Details on regression model for wastewater concentration*

To relate the  $SVI_{2RT}$  model predictions to the serial wastewater measurements of SARS-CoV-2 (N1) concentrations and normalized SARS-CoV-2 (N1) divided by pepper mild mottle virus (PMMoV) concentration ratio, the Bayesian linear regressions were performed based on aggregated county data and data stratified by sewershed area.

To obtain the broken stick linear regression models,<sup>7</sup> the procedure was as follows: Let  $\tilde{I}_{tj}^{(1)}$  and  $\tilde{I}_{tj}^{(2)}$  be the model estimated percentage prevalence corresponding to the same week and sewershed area for the Alpha and Delta variants, respectively. We first define two basic functions  $B_l(tj)$  and  $B_r(tj)$ :

$$B_l(tj) = \begin{cases} \tilde{I}_{ij}^{(1)} & \text{if } t < 06/05/2021 \\ 0 & \text{Otherwise} \end{cases},$$

and

$$B_r(tj) = \begin{cases} \tilde{I}_{ij}^{(2)} & \text{if } t > 06/05/2021 \\ 0 & \text{Otherwise} \end{cases}.$$

$W_{tj}$  represents the weekly aggregated average wastewater concentration. We can now fit the model of the form:

$$W_{tj} = \beta_{0j} + \beta_{aj}B_l(tj) + \beta_{aj}B_r(tj) + e_{tj}, \quad e_{tj} \sim N(0, \sigma_j^2) \quad (5)$$

In the Bayesian linear regression models, non-informative priors were assigned. Specifically, the non-informative Cauchy distribution was assigned to the regression coefficients, and the non-informative gamma prior was assigned to the dispersion parameter of the error term.

*Time lag-dependency between wastewater concentration and hospitalization rate*

It takes a certain period for the patient to be admitted to the hospital to receive treatment. To identify the time lag-dependency between wastewater concentration and hospitalization rate, a simple linear regression analysis was performed using a time-lagged variable as a predictor. Let  $W_{t-d}$  be the weekly aggregated average wastewater concentration at week  $t$  in the aggregated Jefferson County, and  $d$  represents a time lag.  $H_t$  represents the hospitalization rate at time  $t$ . The regression model with time lag dependent variable is given by:

$$H_t = \beta_0 + \beta_1 W_{t-d} + e_t, \quad e_t \sim N(0, \sigma^2) \quad (6)$$

In this model, we changed the time lag  $d$  from 1 to 4 so that the maximum period from evidence of the community spread of COVID-19 in wastewater to reach a burden to hospitalization is about a month. Of note, hospitalizations data is available daily while wastewater is at a frequency of bi-weekly.

Additionally, we performed a simulation study using this regression model to check how much the hospitalization rate changes according to the vaccination rate. We changed the vaccination rate so that the vaccination percentage of the community was 0% and predicted the serial estimates  $\text{Pred}_t$  in Eq. (4). And then, we predicted the wastewater concentration using a linear regression model and used that as the predictor in the regression model.

*Calculation of effects based on factual and counterfactual scenarios:*

Effects of the factual and counterfactual (zero vaccinated or no Delta variant) are calculated using the area under the respective curves based on the models using factual (empirical) data and counterfactual (synthetic) data. The equation to estimate the effect is given as:

$$\left| \frac{\text{Area under counterfactual model data}}{\text{Area under factual model data}} - 1 \right|$$

*Sensitivity analysis for changing the amount of Delta variant transmission rate*

In our analysis, we assumed the transmission rate of the Delta variant, denoted as  $\beta^\wedge$ , is 150% higher than the Alpha variant. Since this assumption is quite strong, to illustrate its effect, we conducted global sensitivity analysis under various alternative scenarios  $\beta^* = \lambda\beta$ , Where  $\beta^*$  and  $\beta$  are disease transmission rates in Eq. (1). We set  $\lambda$  to 1.2, 1.5, 2.0, 2.5 and 3.0. Then we simulated the ODE (1) and calculate the basic reproduction number  $R_0$ .

*The derivation of the basic reproduction number ( $R_0$ )<sup>8</sup>*

Using  $SVI_2RT$  model, let  $X$  be the vector of infected compartments, denoted by  $x = (I^{(1)}, I^{(2)})^T$ .

The system has a disease-free state  $x_0 = (S_0, V_0, I_0^{(1)}, I_0^{(2)}, R_0, T_0)$ . We define the matrix of new infection  $\mathcal{F}(x)$  and the matrix of all transitions except for the new infection  $V$ . The net transition rates are represented by  $V(x)$ .

$$\mathcal{F}(x) = \begin{pmatrix} \beta S_t I_t^{(1)} + \tilde{\beta} V_t I_t^{(1)} \\ \beta^* S_t I_t^{(2)} + \tilde{\beta}^* V_t I_t^{(2)} \end{pmatrix}, V(x) = \begin{pmatrix} \gamma I^{(1)} \\ \gamma I^{(2)} \end{pmatrix}$$

The next generation matrix is defined as  $FV^{-1}$  where  $F$  and  $V$  represent  $2 \times 2$  matrices at  $x_0$  as follows:

$$F = \begin{bmatrix} \beta S_0 + \tilde{\beta} V_0 & 0 \\ 0 & \beta^* S_0 + \tilde{\beta}^* V_0 \end{bmatrix}, \text{ and } V = \begin{bmatrix} \gamma & 0 \\ 0 & \gamma \end{bmatrix}$$

The next generation matrix  $K$  is calculated as

$$K = FV^{-1} = \begin{bmatrix} \frac{\beta S_0 + \tilde{\beta} V_0}{\gamma} & 0 \\ 0 & \frac{\beta^* S_0 + \tilde{\beta}^* V_0}{\gamma} \end{bmatrix}$$

Finally, the basic reproduction number  $R_0$  is the maximum eigenvalue of the spectral decomposition of the next generation matrix  $K$ :

$$R_0 = \frac{\beta^* S_0 + \tilde{\beta}^* V_0}{\gamma}.$$

If we set  $S_0 = 1$  and  $V_0 = 0$ , then  $R_0 = \frac{\beta^*}{\gamma}$ .



## Supplementary References

- 1 Yeager, R. et al. Wastewater sample site selection to estimate geographically resolved community prevalence of COVID-19: a sampling protocol perspective. *GeoHealth* **5**(7), e2021GH000420 (2021). <https://doi.org/10.1029/2021GH000420>
- 2 Choi, B. & Rempala, G. (2024). Statistical method for identifying relationship between wastewater concentration and community-wide prevalence of COVID-19 (V1.0.0). Zenodo. <https://zenodo.org/doi/10.5281/zenodo.10685975>
- 3 Boyle, L. et al. Selective sweeps in SARS-CoV-2 variant competition. *Proc. Natl. Acad. Sci. USA* **119**(47), e2213879119 (2022). <https://doi.org/10.1073/pnas.2213879119>
- 4 Kläser, K. et al. COVID-19 due to the B.1.617.2 (Delta) variant compared to B.1.1.7 (Alpha) variant of SARS-CoV-2: a prospective observational cohort study. *Sci. Rep. - UK* **12**(1), 10904 (2022). <https://doi.org/10.1038/s41598-022-14016-0>
- 5 Smith, T. et al. Quantifying the relationship between sub-population wastewater samples and community-wide SARS-CoV-2 seroprevalence. *Sci. Total Environ.* **853**, 158567 (2022). <https://doi.org/10.1016/j.scitotenv.2022.158567>
- 6 KhudaBukhsh, W. R., Choi, B., Kenah, E. & Rempala, G. A. Survival dynamical systems: individual-level survival analysis from population-level epidemic models. *Interface Focus* **10**(1), 20190048 (2020). <https://doi.org/10.1098/rsfs.2019.0048>
- 7 Faraway, J. J. *Linear models with R*. 2<sup>nd</sup> ed., CRC press (2016).
- 8 Van den Driessche, P. Reproduction numbers of infectious disease models. *Infectious Disease Modelling* **2**(3), 288–303 (2017). <https://doi.org/10.1016/j.idm.2017.06.002>
